# Supplementary material for: Investigation of biochemical and physiological parameters of the newborn Saiga antelope (Saiga tatarica) in Gansu Province, China
Source: PubMed Central journal article supplement (PMC6879164; doi:10.1371/journal.pone.0224822), 2019-11-26
Supplement: pone.0224822.s001.pdf [file pone.0224822.s001.pdf]

Table1: Descriptive range of biochemical parameters

| Variables                                                             | COUNT  | MEAN ± SD       | MIN     | MAX    | Quantities of percentages |        |        |
|-----------------------------------------------------------------------|--------|-----------------|---------|--------|---------------------------|--------|--------|
|                                                                       |        |                 |         |        | 25%                       | 50%    | 75%    |
| Cholinesterase (x10 <sup>12</sup> /l)                                 | 89.00  | 345.72 ± 151.56 | -206.00 | 738.00 | 272.00                    | 332.00 | 428.00 |
| Triglyceride (mmol/l)                                                 | 89.00  | 0.95 ± 0.73     | 0.01    | 2.92   | 0.37                      | 0.83   | 1.53   |
| Total Cholesterol (mmol/l)                                            | 89.00  | 0.91± 0.39      | 0.00    | 1.83   | 0.66                      | 0.86   | 1.14   |
| HDLP Cholesterol (mmol/l)                                             | 89. 00 | 0.29 ± 0.16     | -0.01   | 0.70   | 0.17                      | 0.24   | 0.39   |
| LDLP Cholesterol (mmol/l)                                             | 89.00  | 0.24 ± 0.10     | 0.00    | 0.50   | 0.16                      | 0.21   | 0.29   |
| Glucose (g/l)                                                         | 89.00  | 7.75 ± 2.67     | 1.16    | 12.49  | 6.35                      | 8.43   | 9.58   |
| Urea (mmol/l)                                                         | 89.00  | 8.13 ± 2.88     | -0.71   | 13.42  | 6.02                      | 8.42   | 10.11  |
| Immunoglobulin (g/l)                                                  | 89.00  | 0.15 ± 0.13     | 0.00    | 0.58   | 0.06                      | 0.13   | 0.24   |
| Total Protein (g/l)                                                   | 89.00  | 37.30 ± 10.18   | 1.23    | 65.45  | 31.83                     | 39.31  | 44.04  |
| Albumin (g/l)                                                         | 89.00  | 8.59 ±7.90      | 4.08    | 1.97   | 6.14                      | 1.16   | 1.55   |
| Alkaline Phosphatase (x10 <sup>6</sup> / <sub>mm</sub> <sup>3</sup> ) | 89.00  | 1.82 ±7.29      | -23.90  | 19.00  | -2.00                     | 1.00   | 7.00   |
| Hydroxybutyrate dehydrogensae (U/l)                                   | 89.00  | 628.95 ± 150.66 | 19.14   | 907.00 | 531.00                    | 661.00 | 738.00 |
| Calcium (mmo/l)                                                       | 89.00  | 1.66 ± 0.12     | 1.20    | 1.97   | 1.60                      | 1.64   | 1.77   |
| Magnesium (mmo/l)                                                     | 89.00  | 0.05 ± 0.07     | -0.11   | 0.22   | 0.03                      | 0.07   | 0.10   |
| Inorganic phosphorus (mmo/l)                                          | 89.00  | 2.61 ± 1.00     | 1.23    | 7.25   | 2.01                      | 2.50   | 3.01   |

- SD= standard deviation, minimum and maximum values.

Table 2: Descriptive ranges of physiological parameters

| Variables                                           | COUNT  | MEAN ± SD       | MIN    | MAX     | Quantities of percentages |        |        |
|-----------------------------------------------------|--------|-----------------|--------|---------|---------------------------|--------|--------|
|                                                     |        |                 |        |         | 25%                       | 50%    | 75%    |
| Total WBC (x10 <sup>9</sup> / <sub>l</sub> )        | 40.00  | 2.46 ± 0.84     | 1.10   | 4.50    | 1.97                      | 2.50   | 2.85   |
| Lymphocyte Ratio (x10 <sup>9</sup> / <sub>l</sub> ) | 40. 00 | 18.59 ± 3.89    | 12.10  | 29.80   | 16.27                     | 17.95  | 20.70  |
| Intermediate (x10 <sup>9</sup> / <sub>l</sub> )     | 40.00  | 16.49 ± 8.12    | 7.70   | 35, 100 | 11.17                     | 13.30  | 18.07  |
| Granulocyte (x10 <sup>9</sup> / <sub>l</sub> )      | 40.00  | 64.90 ± 10.93   | 42.20  | 79.10   | 59.52                     | 67.65  | 71.90  |
| Cholinesterate (x10 <sup>12</sup> /l)               | 40.00  | 338.29 ± 111.66 | -22.00 | 535.00  | 276.50                    | 334.00 | 424.75 |
| Triglyceride (mmol/l)                               | 40.00  | 0.79 ± 0.74     | 0.01   | 2.80    | 0.21                      | 0.46   | 1.24   |

|                                   |       |             |       |      |      |      |      |
|-----------------------------------|-------|-------------|-------|------|------|------|------|
| <b>Total Cholesterol (mmol/l)</b> | 40.00 | 0.90 ± 0.46 | 0.00  | 1.83 | 0.59 | 0.72 | 1.25 |
| <b>HDLP Cholesterol (mmol/l)</b>  | 40.00 | 0.28 ± 0.18 | -0.01 | 0.70 | 0.17 | 0.19 | 0.43 |

SD= standard deviation, minimum and maximum values.

Table 3. Comparison of biochemical parameters of female and male

| Variable                                                     | Female |                  | Male |                   | P-value           |
|--------------------------------------------------------------|--------|------------------|------|-------------------|-------------------|
|                                                              | n      | Mean ± SD        | n    | Mean ± SD         |                   |
| <b>Cholinesterase (x10<sup>12</sup>/l)</b>                   | 50     | 36.66 ± 34.332   | 36   | 52.056 ± 58.931   | 0.1311            |
| <b>Triglyceride (mmol/l)</b>                                 | 50     | 0.76 ± 0.483     | 36   | 1.238 ± 0.914     | <b>**0.0024</b>   |
| <b>Total cholesterol (mmol/l)</b>                            | 50     | 0.89 ± 0.345     | 36   | 1.027 ± 0.413     | 0.0888            |
| <b>HDLP Cholesterol (mmol/l)</b>                             | 50     | 0.27 ± 0.154     | 36   | 0.338 ± 0.176     | 0.0766            |
| <b>LDLP Cholesterol (mmol/l)</b>                             | 50     | 0.23 ± 0.095     | 36   | 0.276 ± 0.108     | <b>*0.0241</b>    |
| <b>Glucose (g/l)</b>                                         | 50     | 8.24 ± 2.156     | 36   | 7.446 ± 2.916     | 0.1522            |
| <b>Urea (mmol/l)</b>                                         | 50     | 8.73 ± 2.693     | 36   | 7.964 ± 2.206     | 0.1628            |
| <b>Immunoglobulin (g/l)</b>                                  | 50     | 0.15 ± 0.145     | 36   | 0.178 ± 0.127     | 0.3752            |
| <b>Total protein (g/l)</b>                                   | 50     | 39.66 ± 16.621   | 36   | 39.218 ± 8.123    | 0.8818            |
| <b>Albumin (g/l)</b>                                         | 50     | 24.60 ± 6.246    | 36   | 23.633 ± 6.676    | 0.4943            |
| <b>Alkaline phosphatase (x10<sup>6</sup>/mm<sup>3</sup>)</b> | 50     | 5.22 ± 16.621    | 36   | 31.167 ± 136.371  | 0.1856            |
| <b>Hydroxybutyrate dehydrogenase (U/l)</b>                   | 50     | 652.46 ± 196.890 | 36   | 631.806 ± 136.371 | 0.5895            |
| <b>Creatine kinase (umol/l)</b>                              | 50     | 740.56 ± 348.729 | 36   | 501.639 ± 225.249 | <b>***0.00053</b> |
| <b>Calcium (mmo/l)</b>                                       | 50     | -1.67 ± 0.098    | 36   | -1.673 ± 0.135    | 0.9476            |
| <b>Magnesium (mmo/l)</b>                                     | 50     | 0.05 ± 0.084     | 36   | -0.203 ± 1.681    | 0.2858            |
| <b>Inorganic phosphorous (mmol/l)</b>                        | 50     | 2.54 ± 1.141     | 36   | 2.629 ± 0.632     | 0.6707            |

SD=standard deviation values, n=number of samples, t-test P-value (\*p<0.05, \*\*P<0.001, \*\*\*P<0.0001)

Table 4. Comparison of physiological/hematological parameters of female and male

| Variable                                           | Female |             | Male |           | P-Value |
|----------------------------------------------------|--------|-------------|------|-----------|---------|
|                                                    | n      | Mean ± SD   | n    | Mean ± SD |         |
| <b>Total white blood cells (x10<sup>9</sup>/l)</b> | 18     | 2.48 ± 0.91 | 21   | 2.38±0.78 | 0.7067  |

|                                                                    |    |                |    |                |                |
|--------------------------------------------------------------------|----|----------------|----|----------------|----------------|
| Lymphocyte ratio (x10 <sup>9</sup> /l)                             | 18 | 19.51 ± 4.46   | 21 | 18.03±3.19     | 0.2386         |
| Intermediate cell ratio (x10 <sup>9</sup> /l)                      | 18 | 16.15 ± 8.12   | 21 | 17.21±8.25     | 0.6894         |
| Granulocyte ratio (x10 <sup>9</sup> /l)                            | 18 | 64.33± 10.12   | 21 | 64.76±10.00    | 0.8963         |
| Lymphocyte (x10 <sup>9</sup> /l)                                   | 18 | 0.49 ± 0.24    | 21 | 0.41±0.13      | 0.1915         |
| Intermediate cell (x10 <sup>9</sup> /l)                            | 18 | 0.36 ± 0.17    | 21 | 0.39 ±0.24     | 0.6628         |
| Granulocyte (x10 <sup>9</sup> /l)                                  | 18 | 1.63 ± 0.67    | 21 | 1.58±0.60      | 0.7987         |
| Total Number of red blood cells (x10 <sup>12</sup> /l)             | 18 | 6.60 ± 1.70    | 21 | 6.93±1.16      | 0.4765         |
| Hemoglobin (g/l)                                                   | 18 | 151.33±42.63   | 21 | 157.43±30.51   | 0.6070         |
| Hematocrit (%)                                                     | 18 | 73.59± 13.32   | 21 | 79.49±8.86     | 0.1073         |
| Average red blood cell volume (10 <sup>12</sup> /mm <sup>3</sup> ) | 18 | 123.42± 3.80   | 21 | 120.82±3.28    | <b>0.0277*</b> |
| Hemoglobin content (g/l)                                           | 18 | 22.74 ± 1.03   | 21 | 22.59 ±0.88    | 0.6293         |
| Hemoglobin concentration (g/l)                                     | 18 | 182.33± 8.11   | 21 | 184.76±6.80    | 0.3154         |
| Red blood cell distribution width SD (x10 <sup>12</sup> /l)        | 18 | 52.97 ± 3.09   | 21 | 53.00±3.40     | 0.9754         |
| Red blood cell distribution width CV(x10 <sup>12</sup> /l)         | 18 | 15.56 ± 0.69   | 21 | 15.84±0.87     | 0.2667         |
| Total number of platelets (x10 <sup>9</sup> /l)                    | 18 | 1089.72±282.94 | 21 | 1203.14±205.20 | 0.1563         |
| Average platelet volume (x10 <sup>9</sup> /l)                      | 18 | 8.02 ± 0.46    | 21 | 8.29±0.54      | 0.0986         |
| Platelet distribution width (x10 <sup>9</sup> /l)                  | 18 | 5.02 ± 0.83    | 21 | 4.97 ±0.34     | 0.7810         |
| Platelet pressure (x10 <sup>9</sup> /l)                            | 18 | 0.88 ± 0.26    | 21 | 1.00 ±0.19     | 0.1021         |
| Platelet large cell ratio (x10 <sup>9</sup> /l)                    | 18 | 0.92 ± 0.17    | 21 | 0.99 ±0.19     | 0.2461         |

SD=Standard deviation values, n=samples size, t-test P-value (\*p<0.05)

Table 5: Comparison of biochemical parameters of Newborn Saiga antelope with published data on the horses.

| Variables                  | Newborn Saiga antelope (n=36) | Equus Przewalski (n=20) | Ergebinese dei (n=39-78) | Equus horse (n=4) | Light horse (n=4) |
|----------------------------|-------------------------------|-------------------------|--------------------------|-------------------|-------------------|
| Total protein (g/l)        | 39.218 ± 8.123                | 69 ± 1                  | 64 ± 6                   | 71 (64-81)        | 64 ± 5            |
| Albumin (g/l)              | 23.633 ± 6.676                | NA                      | 33 ± 3                   | 36 (33-37)        | 31 ± 2            |
| Glucose (g/l)              | 7.446 ± 2.916                 | 6.22 ± 1.17             | 8.27± 3.4                | NA                | 4.55±0.52         |
| Creatine kinase (umol/l)   | 501.639 ± 225.249             | 99.01 ± 25.64           | 106.01 ± 17.68           | 141.44 - 265.2    | 115 ± 18          |
| Urea (mmol/l)              | 7.446 ± 2.916                 | 4.13 ± 2.75             | 5.92 ± 1.35              | 4.9 - 11.32       | NA                |
| Total Cholesterol (mmol/l) | 1.027 ± 0.413                 | NA                      | 2.44 ± 0.43              | 2.28(2.18-2.36)   | 2.25 ± 0.34       |
| Calcium (mmol/l)           | -1.673 ± 0.135                | 3 ± 0.1                 | 2.8 ± 0.23               | 2.38 (1.8-3.05)   | 2.98 ± 0.13       |
| Magnesium (mmol/l)         | -0.203 ± 1.681                | NA                      | NA                       | NA                | 0.82±0.04         |

NA=not available, n=samples size

Table 6: Comparison of physiological parameters of Newborn Saiga antelope with published data on the horses.

| Variables                         | Newborn Saiga antelope<br>(n=18) | Equus Przewalski<br>(n=20) | Ergebinese dei<br>(n=39-78) | Equus horse<br>(n=4) | Light horse<br>(n=44-55) |
|-----------------------------------|----------------------------------|----------------------------|-----------------------------|----------------------|--------------------------|
| Hemoglobin (g/l)                  | 151.33 ± 42.63                   | 155 ± 1.7                  | 154 ± 2                     | 163 (14.3–20)        | 146 ± 16.5               |
| Lymphocytes (x10 <sup>1</sup> /l) | 0.49 ± 0.24                      | 2.8 ± 0.81                 | NA                          | NA                   | 3.10 ± 0.75              |
| Hematocrit (l/l)                  | 73.59 ± 13.32                    | 43.7 ± 3.7                 | 0.42 ± 0.07                 | 0.47(0.38–0.50)      | 0.40 ± 0.04              |
| Total WBC (x10 <sup>1</sup> /l)   | 2.48 ± 0.91                      | 8.26 ± 1.68                | 8.3 ± 2.5                   | 9.6 (8.4–10.8)       | 7.45 ± 1.28              |
| Total RBC (x10 <sup>1</sup> /l)   | 6.60 ± 1.70                      | 8.9 ± 0.9                  | NA                          | 8.6 (8.4–10.8)       | 8.8 ± 0.95               |

NA=not available, n=samples size

Fig 1 below compares range of closely related parameters of Triglyceride, Cholinesterate, HDLP and LDLP

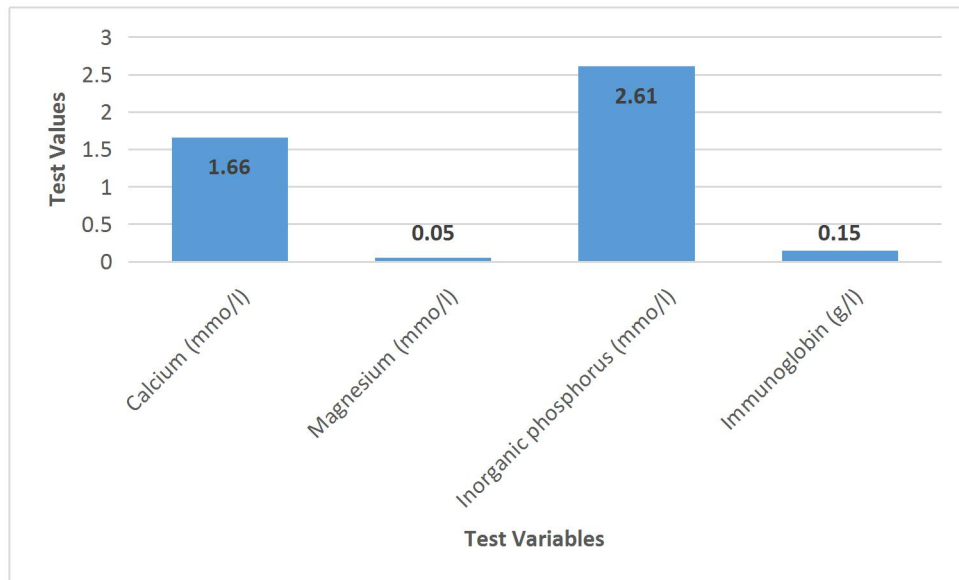

Fig 1: Comparison of closely related biochemical parameters

Fig 2. below sets out the comparison among parameters of calcium, magnesium, phosphorous and immunoglobulin.

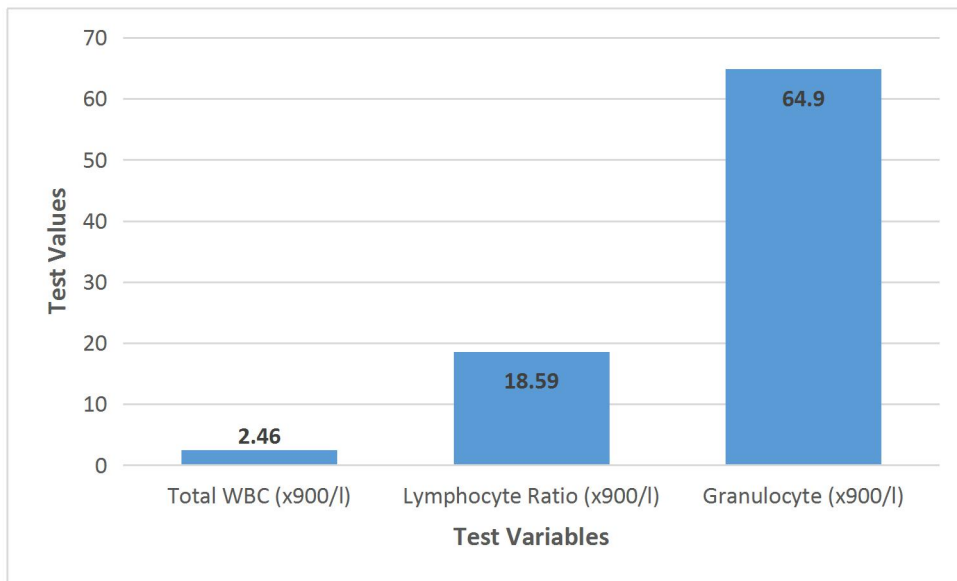

Fig 2: Comparison of closely related biochemical parameters

Fig 3. explains comparison among parameters of total WBC, lymphocyte ratio and granulocyte. All these have been compared base on ranges but not statistically.

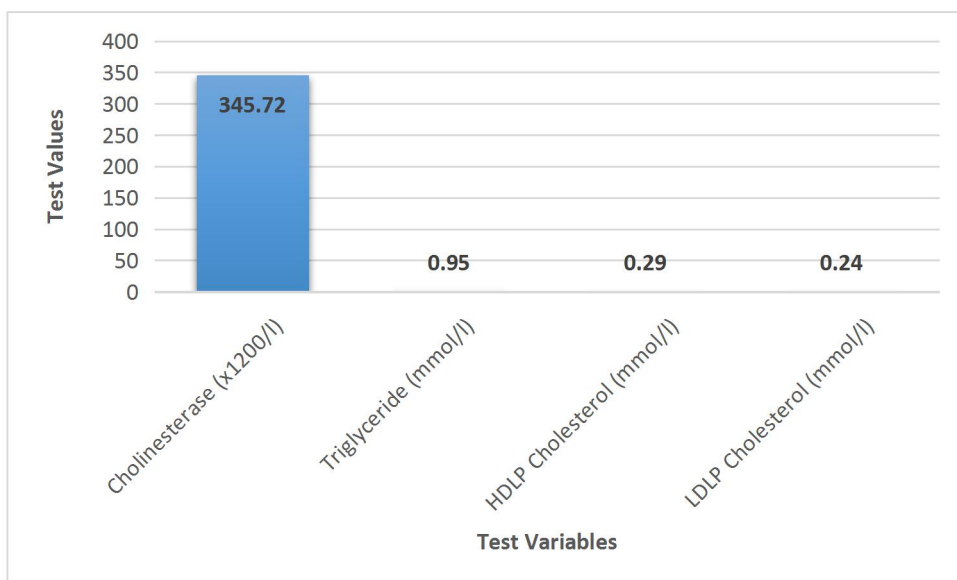

Fig 3: Comparison of closely related physiological parameters
