# Supplementary material for: Investigation of biochemical and physiological parameters of the newborn Saiga antelope (Saiga tatarica) in Gansu Province, China
Source: PubMed Central journal article supplement (PMC6879164; doi:10.1371/journal.pone.0224822), 2019-11-26
Supplement: pone.0224822.s002.pdf [file pone.0224822.s002.pdf]

# Python Analysis Notebook

November 18, 2018

```
In [1]: #import the librerries for the analysis
import pandas as pd
import numpy as np
import matplotlib.pyplot as plt
%matplotlib inline
```

```
In [4]: #read in the data from the csv file
df=pd.read_csv("mawoloCleanData.csv")
#view the first five rows from the dataset
df.head()
```

```
Out[4]:
```

|   | cholinesterase | triglyceride | totalcholesterol | \ |
|---|----------------|--------------|------------------|---|
| 0 | 266.0          | 1.16         | 1.83             |   |
| 1 | 254.0          | 1.14         | 1.83             |   |
| 2 | 214.0          | 1.48         | 1.77             |   |
| 3 | 280.0          | 1.48         | 1.80             |   |
| 4 | 535.0          | 0.33         | 0.60             |   |

  

|   | highdensitylipoproteincholestero | lowdensitylipoproteincholesterol | \ |
|---|----------------------------------|----------------------------------|---|
| 0 | 0.69                             | 0.48                             |   |
| 1 | 0.70                             | 0.48                             |   |
| 2 | 0.62                             | 0.48                             |   |
| 3 | 0.64                             | 0.50                             |   |
| 4 | 0.17                             | 0.16                             |   |

  

|   | glucose | urea | immunoglobuling | totalprotein | albumin      | \ |
|---|---------|------|-----------------|--------------|--------------|---|
| 0 | 8.46    | 5.24 | 0.08            | 42.630001    | 4.080186e-07 |   |
| 1 | 8.29    | 5.32 | 0.41            | 42.860001    | 2.040093e-06 |   |
| 2 | 8.65    | 4.59 | 0.00            | 43.240002    | 6.097965e-06 |   |
| 3 | 8.94    | 4.70 | 0.36            | 45.830002    | 1.421690e-05 |   |
| 4 | 10.16   | 8.39 | 0.44            | 33.820000    | 2.841626e-05 |   |

  

|   | alkalinephosphatase | hydroxybutyratedehydrogenase | creatinekinase | calcium | \    |
|---|---------------------|------------------------------|----------------|---------|------|
| 0 | 1.157303            |                              | 784.0          | 686.0   | 1.74 |
| 1 | 2.134831            |                              | 774.0          | 694.0   | 1.81 |
| 2 | 3.044944            |                              | 771.0          | 423.0   | 1.71 |
| 3 | 3.595506            |                              | 804.0          | 445.0   | 1.80 |

|   |           |                     |       |      |
|---|-----------|---------------------|-------|------|
| 4 | -3.000000 | 631.0               | 932.0 | 1.80 |
|   | magnesium | inorganicphosphorus |       |      |
| 0 | 0.16      | 2.86                |       |      |
| 1 | 0.15      | 2.80                |       |      |
| 2 | 0.15      | 2.81                |       |      |
| 3 | 0.15      | 2.90                |       |      |
| 4 | 0.08      | 2.64                |       |      |

## Exploratory data Analysis

1. Check for the datatype for each of the variables

```
In [5]: #check for each column data type
df.dtypes
```

```
Out[5]: cholinesterase          float64
triglyceride                   float64
totalcholesterol               float64
highdensitylipoproteincholesterol float64
lowdensitylipoproteincholesterol float64
glucose                        float64
urea                           float64
immunoglobuling                float64
totalprotein                   float64
albumin                        float64
alkalinephosphatase            float64
hydroxybutyratehydrogenase     float64
creatinekinase                 float64
calcium                        float64
magnesium                      float64
inorganicphosphorus            float64
dtype: object
```

```
In [6]: colnames=df.columns.values.tolist()
colnames
```

```
Out[6]: ['cholinesterase',
'triglyceride',
'totalcholesterol',
'highdensitylipoproteincholesterol',
'lowdensitylipoproteincholesterol',
'glucose',
'urea',
'immunoglobuling',
'totalprotein',
'albumin',
'alkalinephosphatase',
'hydroxybutyratehydrogenase',
```

```
'creatin kinase',
'calcium',
'magnesium',
'inorganicphosphorus']
```

### CHECK FOR MISSING VALUES

Check for missing values and remove them if any

```
In [7]: nullcheckdf=df.isnull()
nullcheckdf.head()
```

```
Out [7]: cholinerastase  triglyceride  totalcholesterol  \
0          False          False          False
1          False          False          False
2          False          False          False
3          False          False          False
4          False          False          False

          highdensitylipoproteincholesterol  lowdensitylipoproteincholesterol  \
0                                False                                False
1                                False                                False
2                                False                                False
3                                False                                False
4                                False                                False

          glucose  urea  immunoglobuling  totalprotein  albumin  \
0      False  False          False          False  False
1      False  False          False          False  False
2      False  False          False          False  False
3      False  False          False          False  False
4      False  False          False          False  False

          alkalinephosphatase  hydroxybutyrate dehydrogenase  creatiner kinase  calcium  \
0              False              False              False      False
1              False              False              False      False
2              False              False              False      False
3              False              False              False      False
4              False              False              False      False

          magnesium  inorganicphosphorus
0          False          False
1          False          False
2          False          False
3          False          False
4          False          False
```

```
In [8]: print("True Mean there are Missing Values \n Falses Mean there are No Missing Values \n")
for v in zip(colnames):
    v=v[0]
```

```
print(nullcheckdf[v].value_counts())
print("-----")
print()
```

True Mean there are Missing Values  
False Mean there are No Missing Values

False 89  
Name: cholinesterase, dtype: int64  
-----

False 89  
Name: triglyceride, dtype: int64  
-----

False 89  
Name: totalcholesterol, dtype: int64  
-----

False 89  
Name: highdensitylipoproteincholesterol, dtype: int64  
-----

False 89  
Name: lowdensitylipoproteincholesterol, dtype: int64  
-----

False 89  
Name: glucose, dtype: int64  
-----

False 89  
Name: urea, dtype: int64  
-----

False 89  
Name: immunoglobuling, dtype: int64  
-----

False 89  
Name: totalprotein, dtype: int64  
-----

False 89  
Name: albumin, dtype: int64  
-----

```

False      89
Name: alkalinephosphatase, dtype: int64
-----

False      89
Name: hydroxybutyratehydrogenase, dtype: int64
-----

False      89
Name: creatinekinase, dtype: int64
-----

False      89
Name: calcium, dtype: int64
-----

False      89
Name: magnesium, dtype: int64
-----

False      89
Name: inorganicphosphorus, dtype: int64
-----

```

**Missing Values Analysis:** From the above results. we see that there are no missing values.  
**DESCRIPTIVE STATISTICS**

1. The Descriptive statistics for the numerical variables. The below show the following for each of the numerical variables.
  - a) The number of entries/observation
  - b) The Mean/ Average for each of the variables entries
  - c) std (standard deviation) of the values from the mean
  - d) Quantiles: 25%, 50% and 75% quantiles
  - e) Max(Maximum) and Min(Minimum) values

*Python describe() function is used to produce the above stated statistics for all the numerical variables.*

```
In [9]: df.describe()
```

```

Out[9]:
      cholinerase  triglyceride  totalcholesterol  \
count      89.000000      89.000000      89.000000
mean      345.725918       0.952921       0.918779
std      151.563582       0.733795       0.398138
min      -206.000000       0.010000       0.000000
25%       272.000000       0.370000       0.660000

```

|     |            |          |          |
|-----|------------|----------|----------|
| 50% | 332.000000 | 0.830000 | 0.860000 |
| 75% | 428.000000 | 1.530000 | 1.140000 |
| max | 738.000000 | 2.920000 | 1.830000 |

|       | highdensitylipoproteincholestero | lowdensitylipoproteincholesterol |
|-------|----------------------------------|----------------------------------|
| count | 89.000000                        | 89.000000                        |
| mean  | 0.293596                         | 0.240691                         |
| std   | 0.168032                         | 0.106660                         |
| min   | -0.010000                        | 0.000000                         |
| 25%   | 0.170000                         | 0.160000                         |
| 50%   | 0.240000                         | 0.210000                         |
| 75%   | 0.390000                         | 0.290000                         |
| max   | 0.700000                         | 0.500000                         |

|       | glucose   | urea      | immunoglobuling | totalprotein | albumin      |
|-------|-----------|-----------|-----------------|--------------|--------------|
| count | 89.000000 | 89.000000 | 89.000000       | 89.000000    | 8.900000e+01 |
| mean  | 7.750449  | 8.134838  | 0.158633        | 37.307662    | 8.596100e+00 |
| std   | 2.670234  | 2.889986  | 0.136992        | 10.187337    | 7.902623e+00 |
| min   | 1.160000  | -0.710000 | 0.000000        | 1.239213     | 4.080186e-07 |
| 25%   | 6.350000  | 6.020000  | 0.060000        | 31.830000    | 6.143622e-03 |
| 50%   | 8.430000  | 8.420000  | 0.130000        | 39.310001    | 1.160449e+01 |
| 75%   | 9.580000  | 10.110000 | 0.240000        | 44.040001    | 1.550000e+01 |
| max   | 12.490000 | 13.420000 | 0.580000        | 65.459999    | 1.970000e+01 |

|       | alkalinephosphatase | hydroxybutyratedehydrogenase | creatinekinase |
|-------|---------------------|------------------------------|----------------|
| count | 89.000000           | 89.000000                    | 89.000000      |
| mean  | 1.823621            | 628.102765                   | 628.954551     |
| std   | 7.295374            | 150.669045                   | 326.743981     |
| min   | -23.900000          | 19.146067                    | 30.932585      |
| 25%   | -2.000000           | 531.000000                   | 422.000000     |
| 50%   | 1.000000            | 661.000000                   | 534.000000     |
| 75%   | 7.000000            | 738.000000                   | 799.000000     |
| max   | 19.000000           | 907.000000                   | 1589.000000    |

|       | calcium   | magnesium | inorganicphosphorus |
|-------|-----------|-----------|---------------------|
| count | 89.000000 | 89.000000 | 89.000000           |
| mean  | 1.668090  | 0.057438  | 2.610337            |
| std   | 0.122455  | 0.078197  | 1.000642            |
| min   | 1.200000  | -0.112360 | 1.230000            |
| 25%   | 1.600000  | 0.030000  | 2.010000            |
| 50%   | 1.640000  | 0.070000  | 2.500000            |
| 75%   | 1.770000  | 0.100000  | 3.010000            |
| max   | 1.970000  | 0.220000  | 7.250000            |

2. The Descriptive statistics for the categorical variables. Below, the descriptive statistics for the categorical variables are produce using pandas **describe()** function with the include object parameter

The statistics produced are:

- a) **Count** -- The number of observations in each variable
- b) **Unique** -- The the total number of unique entries for each variable
- c) **top** -- The entry with the high frequency
- d) **freq - Frequency** -- the total number the top value occurs in the variable

```
In [14]: #import the matrix plotting library from the pandas library
from pandas.tools.plotting import scatter_matrix as sm
sm(df[0:4:1,4])
```

-----  
 TypeError Traceback (most recent call last)

```
<ipython-input-14-77a24c8d5341> in <module>()
    1 #import the matrix plotting library from the pandas library
    2 from pandas.tools.plotting import scatter_matrix as sm
----> 3 sm(df[0:4:1,4])
```

```
C:\Program Files (x86)\Microsoft Visual Studio\Shared\Anaconda3_64\lib\site-packages\pan
2137         return self._getitem_multilevel(key)
2138     else:
-> 2139         return self._getitem_column(key)
2140
2141     def _getitem_column(self, key):
```

```
C:\Program Files (x86)\Microsoft Visual Studio\Shared\Anaconda3_64\lib\site-packages\pan
2144         # get column
2145         if self.columns.is_unique:
-> 2146             return self._get_item_cache(key)
2147
2148         # duplicate columns & possible reduce dimensionality
```

```
C:\Program Files (x86)\Microsoft Visual Studio\Shared\Anaconda3_64\lib\site-packages\pan
1838         """Return the cached item, item represents a label indexer."""
1839         cache = self._item_cache
-> 1840         res = cache.get(item)
1841         if res is None:
1842             values = self._data.get(item)
```

TypeError: unhashable type: 'slice'
