# Supplementary material for: Investigation of biochemical and physiological parameters of the newborn Saiga antelope (Saiga tatarica) in Gansu Province, China
Source: PubMed Central journal article supplement (PMC6879164; doi:10.1371/journal.pone.0224822), 2019-11-26
Supplement: pone.0224822.s003.pdf [file pone.0224822.s003.pdf]

# Python Analysis Notebook

November 18, 2018

```
In [1]: #import the librerries for the analysis
import pandas as pd
import numpy as np
import matplotlib.pyplot as plt
%matplotlib inline
```

```
In [2]: #read in the data from the csv file
df=pd.read_csv("mawoloCleanData.csv")
#view the first five rows from the dataset
df.head()
```

```
Out[2]:
```

|   | cholinesterase | triglyceride | totalcholesterol | \ |
|---|----------------|--------------|------------------|---|
| 0 | 266.0          | 1.16         | 1.83             |   |
| 1 | 254.0          | 1.14         | 1.83             |   |
| 2 | 214.0          | 1.48         | 1.77             |   |
| 3 | 280.0          | 1.48         | 1.80             |   |
| 4 | 535.0          | 0.33         | 0.60             |   |

  

|   | highdensitylipoproteincholestero | lowdensitylipoproteincholesterol | \ |
|---|----------------------------------|----------------------------------|---|
| 0 | 0.69                             | 0.48                             |   |
| 1 | 0.70                             | 0.48                             |   |
| 2 | 0.62                             | 0.48                             |   |
| 3 | 0.64                             | 0.50                             |   |
| 4 | 0.17                             | 0.16                             |   |

  

|   | glucose | urea | immunoglobuling | totalprotein | albumin      | \ |
|---|---------|------|-----------------|--------------|--------------|---|
| 0 | 8.46    | 5.24 | 0.08            | 42.630001    | 4.080186e-07 |   |
| 1 | 8.29    | 5.32 | 0.41            | 42.860001    | 2.040093e-06 |   |
| 2 | 8.65    | 4.59 | 0.00            | 43.240002    | 6.097965e-06 |   |
| 3 | 8.94    | 4.70 | 0.36            | 45.830002    | 1.421690e-05 |   |
| 4 | 10.16   | 8.39 | 0.44            | 33.820000    | 2.841626e-05 |   |

  

|   | alkalinephosphatase | hydroxybutyratedehydrogenase | creatinekinase | calcium | \ |
|---|---------------------|------------------------------|----------------|---------|---|
| 0 | 1.157303            | 784.0                        | 686.0          | 1.74    |   |
| 1 | 2.134831            | 774.0                        | 694.0          | 1.81    |   |
| 2 | 3.044944            | 771.0                        | 423.0          | 1.71    |   |
| 3 | 3.595506            | 804.0                        | 445.0          | 1.80    |   |

|   |           |                     |       |      |
|---|-----------|---------------------|-------|------|
| 4 | -3.000000 | 631.0               | 932.0 | 1.80 |
|   | magnesium | inorganicphosphorus |       |      |
| 0 | 0.16      | 2.86                |       |      |
| 1 | 0.15      | 2.80                |       |      |
| 2 | 0.15      | 2.81                |       |      |
| 3 | 0.15      | 2.90                |       |      |
| 4 | 0.08      | 2.64                |       |      |

### Exploratory data Analysis

1. Check for the datatype for each of the variables

In [3]: *#check for each column data type*  
df.dtypes

Out[3]:

|               |                                   |
|---------------|-----------------------------------|
|               | cholinesterase                    |
| float64       | triglyceride                      |
| float64       | totalcholesterol                  |
| float64       | highdensitylipoproteincholesterol |
| float64       | lowdensitylipoproteincholesterol  |
| float64       | glucose                           |
| float64       | urea                              |
| float64       | immunoglobuling                   |
| float64       | totalprotein                      |
| float64       | albumin                           |
| float64       | alkalinephosphatase               |
| float64       | hydroxybutyratehydrogenase        |
| float64       | creatinekinase                    |
| float64       | calcium                           |
| float64       | magnesium                         |
| float64       | inorganicphosphorus               |
| dtype: object |                                   |

In [4]: colnames=df.columns.values.tolist()  
colnames

Out[4]: ['cholinesterase',  
'triglyceride',  
'totalcholesterol',  
'highdensitylipoproteincholesterol',  
'lowdensitylipoproteincholesterol',  
'glucose',  
'urea',  
'immunoglobuling',  
'totalprotein',  
'albumin',  
'alkalinephosphatase',  
'hydroxybutyratehydrogenase',

```

    'creatin kinase',
    'calcium',
    'magnesium',
    'inorganicphosphorus']

```

### CHECK FOR MISSING VALUES

Check for missing values and remove them if any

```

In [5]: nullcheckdf=df.isnull()
        nullcheckdf.head()

```

```

Out[5]:  cholinerase  triglyceride  totalcholesterol  \
0          False          False          False
1          False          False          False
2          False          False          False
3          False          False          False
4          False          False          False

        highdensitylipoproteincholesterol  lowdensitylipoproteincholesterol  \
0                                False                                False
1                                False                                False
2                                False                                False
3                                False                                False
4                                False                                False

        glucose  urea  immunoglobulin  totalprotein  albumin  \
0      False  False          False          False  False
1      False  False          False          False  False
2      False  False          False          False  False
3      False  False          False          False  False
4      False  False          False          False  False

        alkalinephosphatase  hydroxybutyrate dehydrogenase  creatinekinase  calcium  \
0                          False                          False          False  False
1                          False                          False          False  False
2                          False                          False          False  False
3                          False                          False          False  False
4                          False                          False          False  False

        magnesium  inorganicphosphorus
0          False          False
1          False          False
2          False          False
3          False          False
4          False          False

```

```

In [6]: #print("True Mean there are Missing Values \n Falses Mean there are No Missing Values
        #for v in zip(colnames):
        #    v=v[0]

```

```
# print(nullcheckdf[v].value_counts())
# print("-----")
# print()
```

**Missing Values Analysis:** From the above results, we see that there are no missing values.  
**DESCRIPTIVE STATISTICS**

1. The Descriptive statistics for the numerical variables. The below show the following for each of the numerical variables.

- a) The number of entries/observation
- b) The Mean/ Average for each of the variables entries c) std (standard deviation) of the values from the mean d) Quantiles: 25%, 50% and 75% quantiles
- e) Max(Maximum) and Min(Minimum) values

*Python describe() function is used to produce the above stated statistics for all the numerical variables.*

In [7]: df.describe()

Out[7]:

|       | cholinestera | triglyceri | totalcholester | highdensitylipoproteincholester | lowdensitylipoproteincholesterol |
|-------|--------------|------------|----------------|---------------------------------|----------------------------------|
| count | 89.0000      | 89.0000    | 89.0000        | 89.000000                       | 89.000000                        |
| mean  | 345.7259     | 0.9529     | 0.91877        | 0.293596                        | 0.240691                         |
| std   | 151.5635     | 0.7337     | 0.39813        | 0.168032                        | 0.106660                         |
| min   | -            | 0.0100     | 0.00000        | -0.010000                       | 0.000000                         |
| 25%   | 272.0000     | 0.3700     | 0.66000        | 0.170000                        | 0.160000                         |
| 50%   | 332.0000     | 0.8300     | 0.86000        | 0.240000                        | 0.210000                         |
| 75%   | 428.0000     | 1.5300     | 1.14000        | 0.390000                        | 0.290000                         |
| max   | 738.0000     | 2.9200     | 1.83000        | 0.700000                        | 0.500000                         |

  

|       | glucose   | urea      | immunoglobuling | totalprotein | albumin      |
|-------|-----------|-----------|-----------------|--------------|--------------|
| count | 89.000000 | 89.000000 | 89.000000       | 89.000000    | 8.900000e+01 |
| mean  | 7.750449  | 8.134838  | 0.158633        | 37.307662    | 8.596100e+00 |
| std   | 2.670234  | 2.889986  | 0.136992        | 10.187337    | 7.902623e+00 |
| min   | 1.160000  | -0.710000 | 0.000000        | 1.239213     | 4.080186e-07 |
| 25%   | 6.350000  | 6.020000  | 0.060000        | 31.830000    | 6.143622e-03 |
| 50%   | 8.430000  | 8.420000  | 0.130000        | 39.310001    | 1.160449e+01 |
| 75%   | 9.580000  | 10.110000 | 0.240000        | 44.040001    | 1.550000e+01 |

|       |                     |                 |                     |                |              |
|-------|---------------------|-----------------|---------------------|----------------|--------------|
| max   | 12.490000           | 13.420000       | 0.580000            | 65.459999      | 1.970000e+01 |
|       | alkalinephosphatase | hydroxybutyrate | dehydrogenase       | creatin kinase | \            |
| count | 89.000000           | 89.000000       | 89.000000           | 89.000000      |              |
| mean  | 1.823621            | 628.102765      | 628.954551          |                |              |
| std   | 7.295374            | 150.669045      | 326.743981          |                |              |
| min   | -23.900000          | 19.146067       | 30.932585           |                |              |
| 25%   | -2.000000           | 531.000000      | 422.000000          |                |              |
| 50%   | 1.000000            | 661.000000      | 534.000000          |                |              |
| 75%   | 7.000000            | 738.000000      | 799.000000          |                |              |
| max   | 19.000000           | 907.000000      | 1589.000000         |                |              |
|       | calcium             | magnesium       | inorganicphosphorus |                |              |
| count | 89.000000           | 89.000000       | 89.000000           |                |              |
| mean  | 1.668090            | 0.057438        | 2.610337            |                |              |
| std   | 0.122455            | 0.078197        | 1.000642            |                |              |
| min   | 1.200000            | -0.112360       | 1.230000            |                |              |
| 25%   | 1.600000            | 0.030000        | 2.010000            |                |              |
| 50%   | 1.640000            | 0.070000        | 2.500000            |                |              |
| 75%   | 1.770000            | 0.100000        | 3.010000            |                |              |
| max   | 1.970000            | 0.220000        | 7.250000            |                |              |

2. The Descriptive statistics for the categorical variables. Below, the descriptive statistics for the categorical variables are produce using pandas **describe()** function with the include object parameter

The statistics produced are:

- a) **Count** -- The number of observations in each variable
- b) **Unique** -- The the total number of unique entries for each variable
- c) **top** -- The entry with the high frequency
- d) **freq - Frequency** -- the total number the top value occurs in the variable

In [8]: `reviewData=pd.read_csv("reviews Data.csv")`  
`reviewData.head()`

```
Out[8]:
```

|   | ??   | ??    | 1         | ???? | Total white | Lymphocte R | Intermediat | Granulocy | Lymphocy | \ |
|---|------|-------|-----------|------|-------------|-------------|-------------|-----------|----------|---|
| 0 | NaN  | 1     | ????      | 2.0  | 16.7        | 11.0        | 72.3        | 0.3       |          |   |
| 1 | NaN  | 3     | ????      | 2.4  | 22.6        | 17.8        | 59.6        | 0.5       |          |   |
| 2 | NaN  | 4     | ????      | 2.5  | 13.7        | 8.8         | 77.5        | 0.3       |          |   |
| 3 | NaN  | 5     | ????      | 2.6  | 19.8        | 13.7        | 66.5        | 0.5       |          |   |
| 4 | NaN  | 6     | ????      | 2.0  | 19.6        | 12.3        | 68.1        | 0.4       |          |   |
|   | # RB | Cells | Hemoglobi | ...  | Hem. Contr. | RBC Dis.    | C.          | \         |          |   |
| 0 |      | 0.2   | 1.5       | ...  | 121.9       | 22.9        |             |           |          |   |
| 1 |      | 0.4   | 1.5       | ...  | 114.2       | 21.1        |             |           |          |   |
| 2 |      | 0.2   | 2.0       | ...  | 126.0       | 23.1        |             |           |          |   |
| 3 |      | 0.4   | 1.7       | ...  | 122.6       | 22.8        |             |           |          |   |
| 4 |      | 0.2   | 1.4       | ...  | 125.7       | 21.7        |             |           |          |   |

|   | RBC Dis. C..1 | Total Num. of p. | Ave Plate Vol. | Platelet D. | Platelet P. | \ |
|---|---------------|------------------|----------------|-------------|-------------|---|
| 0 | 188           | 52.0             | 15.4           | 1258        | 8.1         |   |
| 1 | 185           | 46.5             | 14.7           | 1222        | 8.8         |   |
| 2 | 183           | 53.9             | 15.5           | 1184        | 7.5         |   |
| 3 | 186           | 52.0             | 15.3           | 1394        | 8.4         |   |
| 4 | 172           | 57.6             | 16.6           | 1353        | 7.7         |   |

|   | Platelet L. CR | Platelet P. | Platelet large cell ratio |
|---|----------------|-------------|---------------------------|
| 0 | 4.6            | 1.1         | 0.9                       |
| 1 | 5.6            | 1.7         | 1.2                       |
| 2 | 4.6            | 0.8         | 0.8                       |
| 3 | 5.1            | 1.7         | 1.3                       |
| 4 | 4.8            | 1.4         | 0.9                       |

[5 rows x 23 columns]

```
In [9]: col=reviewData.columns.values.tolist()
col
```

```
Out[9]: ['??',
'???.1',
'????',
'Total white',
'Lymphocte R',
'Intermediat',
'Granulocy',
'Lymphocy',
'# RB Cells',
'Hemoglobi',
'Hemotocri',
'Ave RB C.',
'Hemob. con',
'Hem. Contr.',
'RBC Dis. C.',
'RBC Dis. C..1',
'Total Num. of p.',
'Ave Plate Vol.',
'Platelet D.',
'Platelet P.',
'Platelet L. CR',
'Platelet P.',
'Platelet large cell ratio']
```

```
In [12]: reviewData.drop(columns=['??', '???.1', '????'], inplace=True)
reviewData.head()
```

|   | Total white | Lymphocte R | Intermediat | Granulocy | Lymphocy | # RB Cells | \ |
|---|-------------|-------------|-------------|-----------|----------|------------|---|
| 0 | 2.0         | 16.7        | 11.0        | 72.3      | 0.3      | 0.2        |   |

|   |     |      |      |      |     |     |
|---|-----|------|------|------|-----|-----|
| 1 | 2.4 | 22.6 | 17.8 | 59.6 | 0.5 | 0.4 |
| 2 | 2.5 | 13.7 | 8.8  | 77.5 | 0.3 | 0.2 |
| 3 | 2.6 | 19.8 | 13.7 | 66.5 | 0.5 | 0.4 |
| 4 | 2.0 | 19.6 | 12.3 | 68.1 | 0.4 | 0.2 |

|   | Hemoglobi | Hemotocri | Ave RB C. | Hemob. con | Hem. Contr. | RBC Dis. C. | \ |
|---|-----------|-----------|-----------|------------|-------------|-------------|---|
| 0 | 1.5       | 6.88      | 158       | 83.8       | 121.9       | 22.9        |   |
| 1 | 1.5       | 6.76      | 143       | 77.1       | 114.2       | 21.1        |   |
| 2 | 2.0       | 6.82      | 158       | 85.9       | 126.0       | 23.1        |   |
| 3 | 1.7       | 6.82      | 156       | 83.6       | 122.6       | 22.8        |   |
| 4 | 1.4       | 6.81      | 148       | 85.6       | 125.7       | 21.7        |   |

|   | RBC Dis. C..1 | Total Num. of p. | Ave Plate Vol. | Platelet D. | Platelet P. | \ |
|---|---------------|------------------|----------------|-------------|-------------|---|
| 0 | 188           | 52.0             | 15.4           | 1258        | 8.1         |   |
| 1 | 185           | 46.5             | 14.7           | 1222        | 8.8         |   |
| 2 | 183           | 53.9             | 15.5           | 1184        | 7.5         |   |
| 3 | 186           | 52.0             | 15.3           | 1394        | 8.4         |   |
| 4 | 172           | 57.6             | 16.6           | 1353        | 7.7         |   |

|   | Platelet L. CR | Platelet P. | Platelet large cell ratio |
|---|----------------|-------------|---------------------------|
| 0 | 4.6            | 1.01        | 0.9                       |
| 1 | 5.6            | 1.07        | 1.2                       |
| 2 | 4.6            | 0.88        | 0.8                       |
| 3 | 5.1            | 1.17        | 1.3                       |
| 4 | 4.8            | 1.04        | 0.9                       |

In [13]: reviewData.dtypes

```
Out[13]: Total white          float64
Lymphocyte R                 float64
Intermediate                  float64
Granulocyte                   float64
Lymphocyte                    float64
# RB Cells                    float64
Hemoglobi                     float64
Hemotocri                     float64
Ave RB C.                      int64
Hemob. con                     float64
Hem. Contr.                   float64
RBC Dis. C.                   float64
RBC Dis. C..1                 int64
Total Num. of p.              float64
Ave Plate Vol.                float64
Platelet D.                    int64
Platelet P.                   float64
Platelet L. CR                 float64
Platelet P.                   float64
Platelet large cell ratio     float64
float64 dtype: object
```

```
In [25]: ndata=reviewData[['Total white ', 'Lymphocte R', 'Intermediat', 'Granulocy']]
         ndata.head()
```

```
Out[25]:
```

|   | Total white | Lymphocte R | Intermediat | Granulocy |
|---|-------------|-------------|-------------|-----------|
| 0 | 2.0         | 16.7        | 11.0        | 72.3      |
| 1 | 2.4         | 22.6        | 17.8        | 59.6      |
| 2 | 2.5         | 13.7        | 8.8         | 77.5      |
| 3 | 2.6         | 19.8        | 13.7        | 66.5      |
| 4 | 2.0         | 19.6        | 12.3        | 68.1      |

```
In [29]: ndata[['cholinesterase', 'triglyceride', 'totalcholesterol', 'highdensitylipoproteincholesterol']]
         ndata.head()
```

C:\Program Files (x86)\Microsoft Visual Studio\Shared\Anaconda3\_64\lib\site-packages\pandas\co  
A value is trying to be set on a copy of a slice from a DataFrame.  
Try using .loc[row\_indexer,col\_indexer] = value instead

See the caveats in the documentation: <http://pandas.pydata.org/pandas-docs/stable/indexing.htm>  
self[k1] = value[k2]

```
Out[29]:
```

|   | Total white | Lymphocte R | Intermediat | Granulocy | cholinesterase | \ |
|---|-------------|-------------|-------------|-----------|----------------|---|
| 0 | 2.0         | 16.7        | 11.0        | 72.3      | 266.0          |   |
| 1 | 2.4         | 22.6        | 17.8        | 59.6      | 254.0          |   |
| 2 | 2.5         | 13.7        | 8.8         | 77.5      | 214.0          |   |
| 3 | 2.6         | 19.8        | 13.7        | 66.5      | 280.0          |   |
| 4 | 2.0         | 19.6        | 12.3        | 68.1      | 535.0          |   |

  

|   | triglyceride | totalcholesterol | highdensitylipoproteincholesterol |
|---|--------------|------------------|-----------------------------------|
| 0 | 1.16         | 1.83             | 0.69                              |
| 1 | 1.14         | 1.83             | 0.70                              |
| 2 | 1.48         | 1.77             | 0.62                              |
| 3 | 1.48         | 1.80             | 0.64                              |
| 4 | 0.33         | 0.60             | 0.17                              |

```
In [35]: ndata.plot(kind='Line', legend=True, figsize=(14,8), grid=True)
```

```
Out[35]: <matplotlib.axes._subplots.AxesSubplot at 0x1698473b0b8>
```



```
In [36]: ndata.describe()
```

```
Out[36]:
```

|       | Total white | Lymphocte R | Intermediat | Granulocy | cholinesterase \ |
|-------|-------------|-------------|-------------|-----------|------------------|
| count | 40.000000   | 40.000000   | 40.000000   | 40.000000 | 40.000000        |
| mean  | 2.462500    | 18.592500   | 16.495000   | 64.907500 | 338.290169       |
| std   | 0.848434    | 3.874002    | 8.120438    | 10.037274 | 111.665106       |
| min   | 1.100000    | 12.100000   | 7.700000    | 42.200000 | -22.000000       |
| 25%   | 1.975000    | 16.275000   | 11.175000   | 59.525000 | 276.500000       |
| 50%   | 2.500000    | 17.950000   | 13.300000   | 67.650000 | 334.000000       |
| 75%   | 2.850000    | 20.700000   | 18.075000   | 71.900000 | 424.750000       |
| max   | 4.500000    | 29.800000   | 35.100000   | 79.100000 | 535.000000       |

  

|       | triglyceride | totalcholesterol | highdensitylipoproteincholestero |
|-------|--------------|------------------|----------------------------------|
| count | 40.000000    | 40.000000        | 40.000000                        |
| mean  | 0.798000     | 0.90225          | 0.282750                         |
| std   | 0.741627     | 0.46739          | 0.187165                         |
| min   | 0.010000     | 0.00000          | -0.010000                        |
| 25%   | 0.217500     | 0.59750          | 0.170000                         |
| 50%   | 0.465000     | 0.72000          | 0.190000                         |
| 75%   | 1.240000     | 1.25250          | 0.432500                         |
| max   | 2.800000     | 1.83000          | 0.700000                         |

```
In [74]: plt.style.use("ggplot")
plt.figure(figsize=(8,12))
plt.title("Comparative analysis of Total White \& cholinesterase")
plt.subplot(2, 1, 1)
plt.hist(ndata['Total white'], orientation='horizontal', histtype='bar')
```

```
plt.ylabel("Total White")
plt.xlabel("frequencies")
plt.subplot(2, 1, 2)
plt.hist(ndata['cholinesterase'],orientation='horizontal')
plt.xlabel("cholinesterase")
plt.ylabel("frequencies")
plt.show()
```
