# Supplementary material for: Investigation of biochemical and physiological parameters of the newborn Saiga antelope (Saiga tatarica) in Gansu Province, China
Source: PubMed Central journal article supplement (PMC6879164; doi:10.1371/journal.pone.0224822), 2019-11-26
Supplement: pone.0224822.s007.pdf [file pone.0224822.s007.pdf]

# BIOMEDICAL INDEX STATISTICS

| Variable                               | Female         |                      | Male           |                       | independent<br>t-test<br>P-Value |
|----------------------------------------|----------------|----------------------|----------------|-----------------------|----------------------------------|
|                                        | Sample<br>Size | Mean $\pm$ SD        | Sample<br>Size | Mean $\pm$ SD         |                                  |
| 1 Cholinesterase                       | 50             | 36.66 $\pm$ 34.332   | 36             | 52.056 $\pm$ 58.931   | > 0.1311                         |
| 2 Triglyceride                         | 50             | 0.76 $\pm$ 0.483     | 36             | 1.238 $\pm$ 0.914     | < <b>**0.0024</b>                |
| 3 Total cholesterol                    | 50             | 0.89 $\pm$ 0.345     | 36             | 1.027 $\pm$ 0.413     | > 0.0888                         |
| 4 High density lipoprotein cholesterol | 50             | 0.27 $\pm$ 0.154     | 36             | 0.338 $\pm$ 0.176     | > 0.0766                         |
| 5 Low density lipoprotein cholesterol  | 50             | 0.23 $\pm$ 0.095     | 36             | 0.276 $\pm$ 0.108     | < <b>*0.0241</b>                 |
| 6 glucose                              | 50             | 8.24 $\pm$ 2.156     | 36             | 7.446 $\pm$ 2.916     | > 0.1522                         |
| 7 Urea                                 | 50             | 8.73 $\pm$ 2.693     | 36             | 7.964 $\pm$ 2.206     | > 0.1628                         |
| 8 Immunoglobulin G                     | 50             | 0.15 $\pm$ 0.145     | 36             | 0.178 $\pm$ 0.127     | > 0.3752                         |
| 9 Total protein                        | 50             | 39.66 $\pm$ 16.246   | 36             | 39.218 $\pm$ 8.123    | > 0.8818                         |
| 10 albumin                             | 50             | 24.60 $\pm$ 6.246    | 36             | 23.633 $\pm$ 6.676    | > 0.4943                         |
| 11 Alkaline phosphatase                | 50             | 5.22 $\pm$ 16.621    | 36             | 31.167 $\pm$ 136.371  | > 0.1856                         |
| 12 Hydroxybutyrate dehydrogenase       | 50             | 652.46 $\pm$ 196.890 | 36             | 631.806 $\pm$ 136.998 | > 0.5895                         |
| 13 Creatine kinase                     | 50             | 740.56 $\pm$ 348.729 | 36             | 501.639 $\pm$ 225.249 | < <b>***0.00053</b>              |
| 14 calcium                             | 50             | -1.67 $\pm$ 0.098    | 36             | -1.673 $\pm$ 0.135    | > 0.9476                         |
| 15 magnesium                           | 50             | 0.05 $\pm$ 0.084     | 36             | -0.203 $\pm$ 1.681    | > 0.2858                         |
| 16 Inorganic phosphoru                 | 50             | 2.54 $\pm$ 1.141     | 36             | 2.629 $\pm$ 0.632     | > 0.6707                         |

**P-VALUE MARKED WITH \* ARE SIGNIFICANT**
