# Supplementary material for: Investigation of biochemical and physiological parameters of the newborn Saiga antelope (Saiga tatarica) in Gansu Province, China
Source: PubMed Central journal article supplement (PMC6879164; doi:10.1371/journal.pone.0224822), 2019-11-26
Supplement: pone.0224822.s008.pdf [file pone.0224822.s008.pdf]

| Variable                                | Female         |                      | Male           |                      | t-test<br>P-Value |
|-----------------------------------------|----------------|----------------------|----------------|----------------------|-------------------|
|                                         | Sample<br>Size | Mean $\pm$ SD        | Sample<br>Size | Mean $\pm$ SD        |                   |
| 1 Total white blood cells               | 18             | 2.48 $\pm$ 0.91      | 21             | 2.38 $\pm$ 0.78      | > 0.7067          |
| 2 Lymphocyte ratio                      | 18             | 19.51 $\pm$ 4.46     | 21             | 18.03 $\pm$ 3.19     | > 0.2386          |
| 3 Intermediate cell ratio               | 18             | 16.15 $\pm$ 8.12     | 21             | 17.21 $\pm$ 8.25     | > 0.6894          |
| 4 Granulocyte ratio                     | 18             | 64.33 $\pm$ 10.12    | 21             | 64.76 $\pm$ 10.00    | > 0.8963          |
| 5 Lymphocyte                            | 18             | 0.49 $\pm$ 0.24      | 21             | 0.41 $\pm$ 0.13      | > 0.1915          |
| 6 Intermediate cell                     | 18             | 0.36 $\pm$ 0.17      | 21             | 0.39 $\pm$ 0.24      | > 0.6628          |
| 7 Granulocytes                          | 18             | 1.63 $\pm$ 0.67      | 21             | 1.58 $\pm$ 0.60      | > 0.7987          |
| 8 Total number of red blood cells       | 18             | 6.60 $\pm$ 1.70      | 21             | 6.93 $\pm$ 1.16      | > 0.4765          |
| 9 Hemoglobin                            | 18             | 151.33 $\pm$ 42.63   | 21             | 157.43 $\pm$ 30.51   | > 0.6070          |
| 10 Hematocrit                           | 18             | 73.59 $\pm$ 13.32    | 21             | 79.49 $\pm$ 8.86     | > 0.1073          |
| 11 Average red blood cell volume        | 18             | 123.42 $\pm$ 3.80    | 21             | 120.82 $\pm$ 3.28    | < <b>0.0277</b>   |
| 12 Hemoglobin content                   | 18             | 22.74 $\pm$ 1.03     | 21             | 22.59 $\pm$ 0.88     | > 0.6293          |
| 13 Hemoglobin concentration             | 18             | 182.33 $\pm$ 8.11    | 21             | 184.76 $\pm$ 6.80    | > 0.3154          |
| 14 Red blood cell distribution width SD | 18             | 52.97 $\pm$ 3.09     | 21             | 53.00 $\pm$ 3.40     | > 0.9754          |
| 15 Red blood cell distribution width CV | 18             | 15.56 $\pm$ 0.69     | 21             | 15.84 $\pm$ 0.87     | > 0.2667          |
| 16 Total number of platelets            | 18             | 1089.72 $\pm$ 282.94 | 21             | 1203.14 $\pm$ 205.20 | > 0.1563          |
| 17 Average platelet volume              | 18             | 8.02 $\pm$ 0.46      | 21             | 8.29 $\pm$ 0.54      | > 0.0986          |
| 18 Platelet distribution width          | 18             | 5.02 $\pm$ 0.83      | 21             | 4.97 $\pm$ 0.34      | > 0.7810          |
| 19 Platelet pressure                    | 18             | 0.88 $\pm$ 0.26      | 21             | 1.00 $\pm$ 0.19      | > 0.1021          |
| 20 Platelet large cell ratio            | 18             | 0.92 $\pm$ 0.17      | 21             | 0.99 $\pm$ 0.19      | > 0.2461          |
